# Supplementary material for: Comparing Fungal Sensitivity to Isothiocyanate Products on Different Botrytis spp.
Source: MDPI journal article supplement (doi:10.3390/plants13060756), 2024-03-07
Supplement: s1 [file s1]

**Supplementary Figure S1.** Alignment of *BcmfsG* coding sequence and homologous gene sequences from different *Botrytis* species: *B. cinerea* B05.10, *B. pseudocinerea* BP362, *B. medusae* B555, *B. fragariae* BCB16 and *B. byssoidea* MUCL94. Gene sequences were selected after running similarity search by Blastn using *BcmfsG* as query sequence. Multiple alignments of protein sequences were carried out with Clustal-Omega and were visualized using ESPrpt 3.0. Blue and green box represent conserved regions between *Botrytis* species within the region corresponding to the domain MFS-1 (pfam07690; interval 136-1140), targets for the design of primers for the identification of *mfsG* gene in other *Botrytis* species by PCR. **The arrows indicate the orientation of the primers used for the *mfsG* gene detection.**

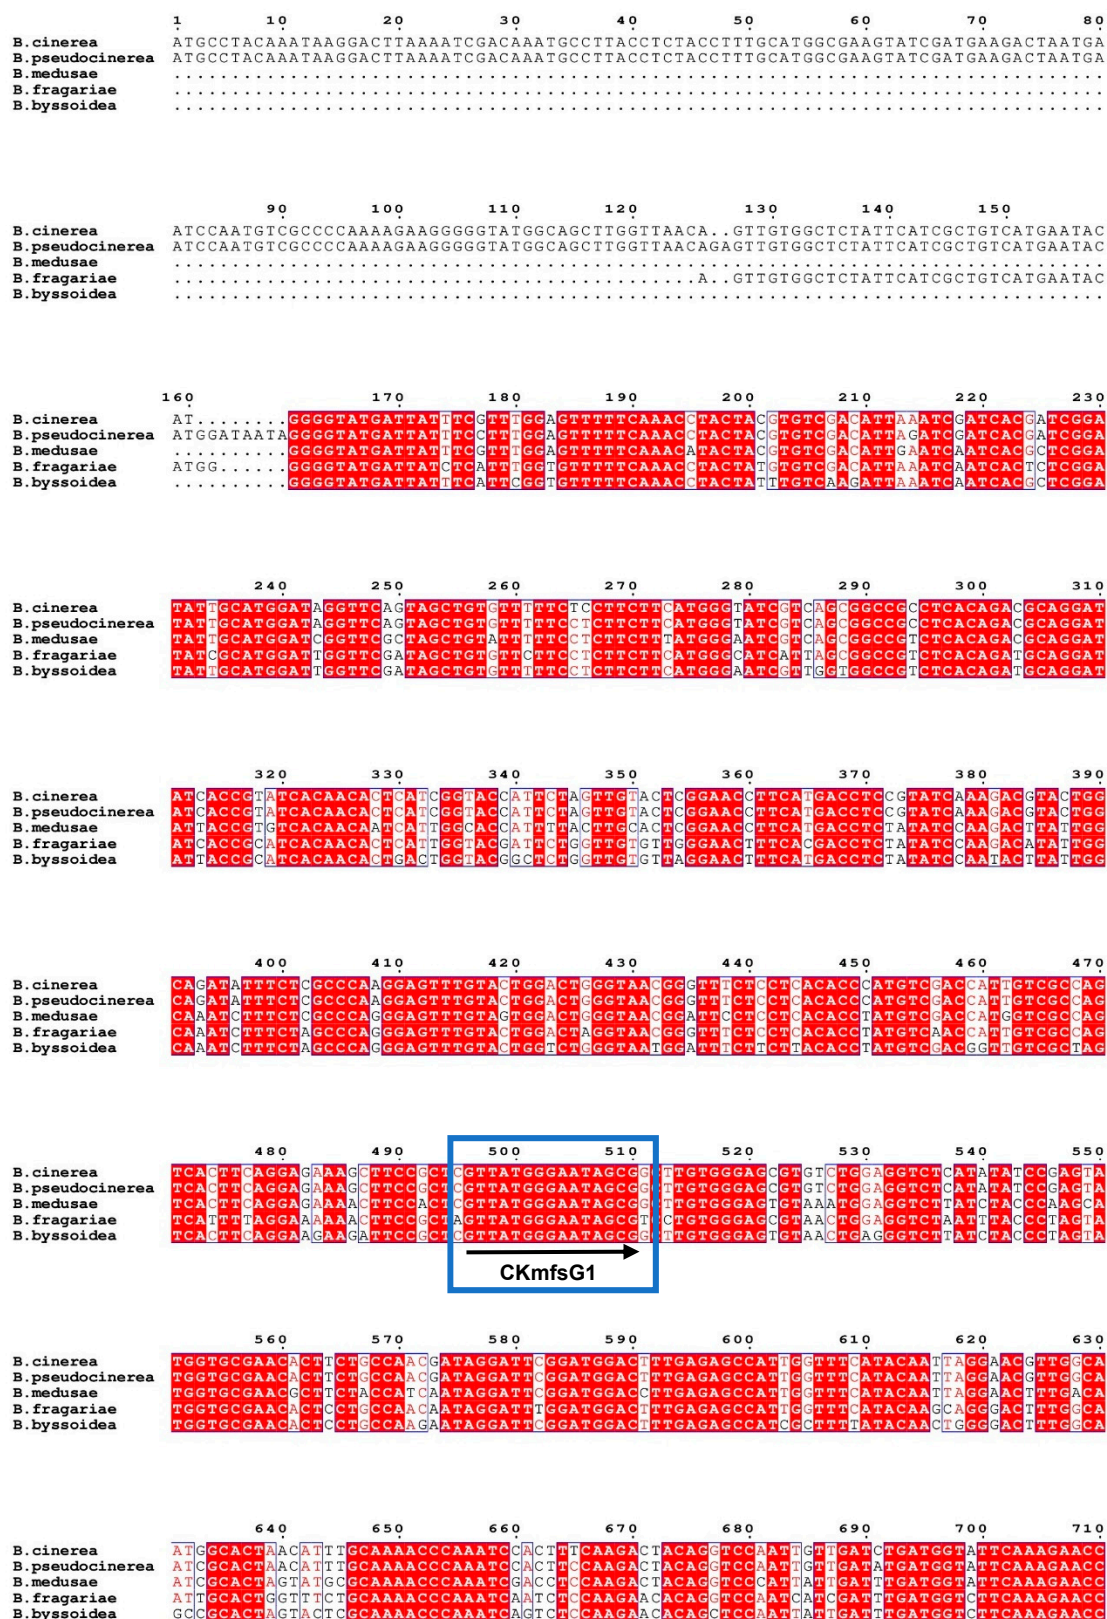

**Supplementary Figure S1 (part 2).** Alignment of *BcmfsG* coding sequence and homologous gene sequences from different *Botrytis* species: *B. cinerea* B05.10, *B. pseudocinerea* BP362, *B. medusae* B555, *B. fragariae* BCB16 and *B. byssoidea* MUCL94. Gene sequences were selected after running similarity search by Blastn using *BcmfsG* as query sequence. Multiple alignments of protein sequences were carried out with Clustal-Omega and were visualized using ESPrpt 3.0. Blue and green box represent conserved regions between *Botrytis* species within the region corresponding to the domain MFS-1 (pfam07690; interval 136-1140), targets for the design of primers for the identification of *mfsG* gene in other *Botrytis* species by PCR. The arrows indicate the orientation of the primers used for the *mfsG* gene detection.

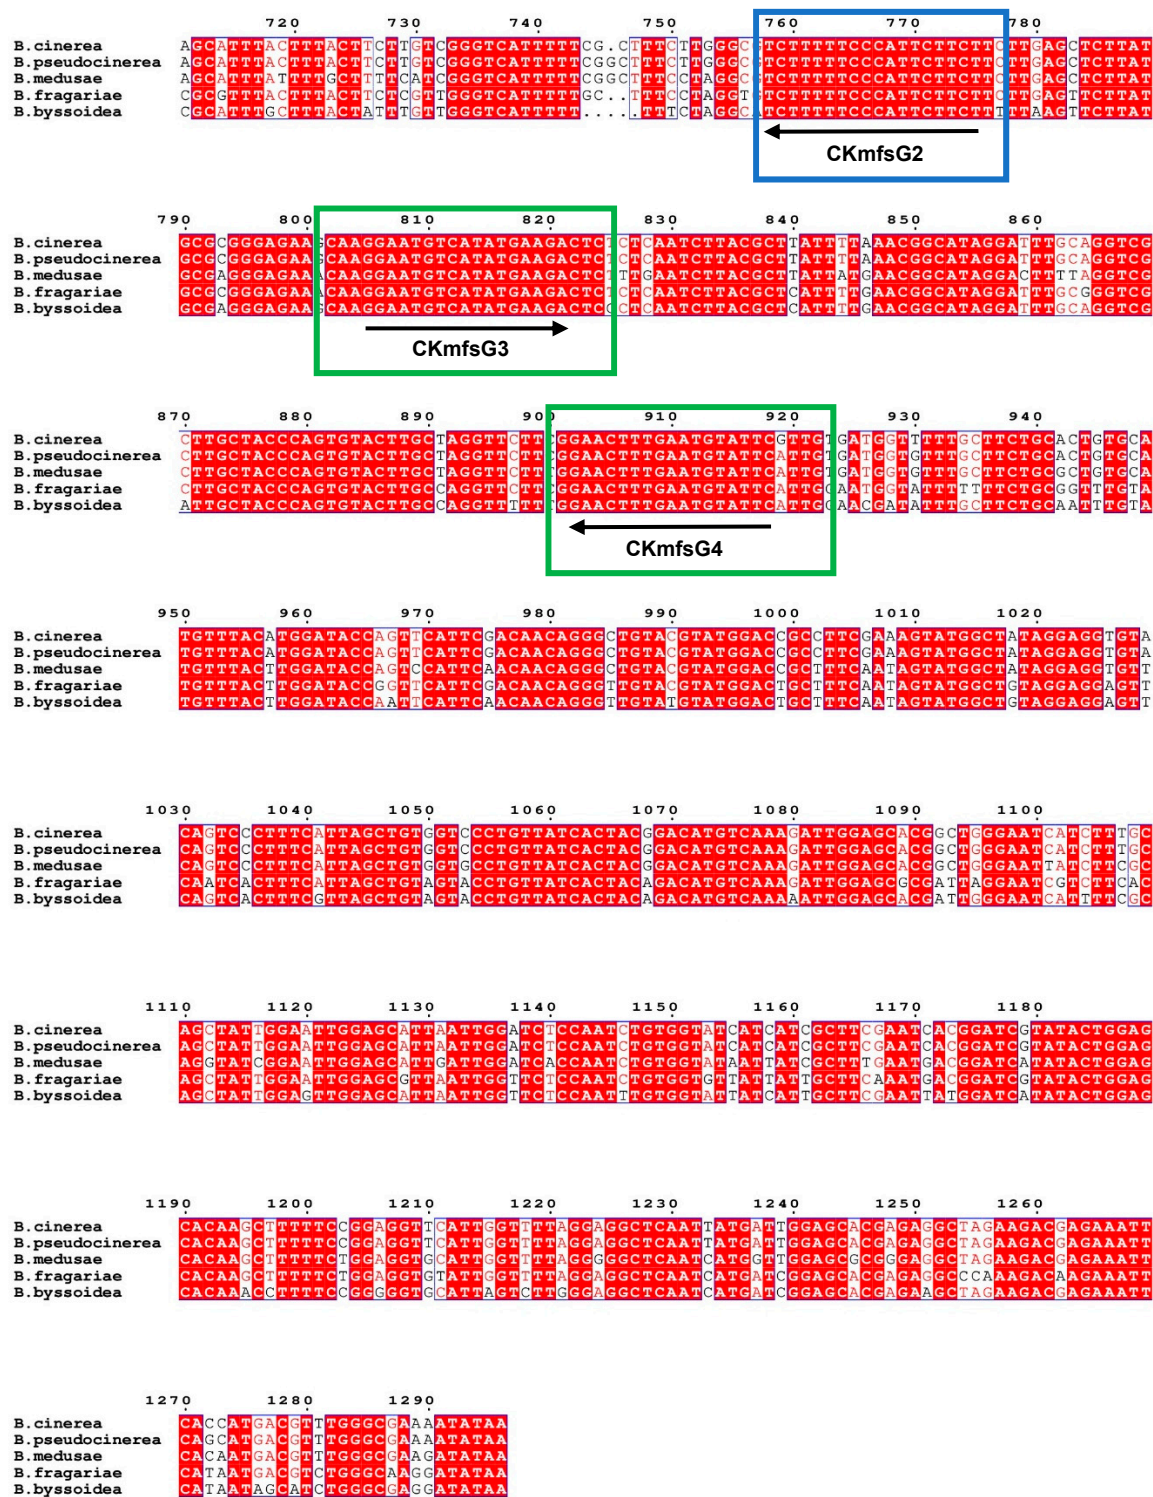

**Supplementary Table S1.** List of oligonucleotides used for the expression analysis study.

| Name of the Oligo   | Sequence                 | Description of the primer                                                          |
|---------------------|--------------------------|------------------------------------------------------------------------------------|
| CKmfsG1             | GTTATGGGAATAGCG          | Identification of the <i>mfsG</i> gene in other <i>Botrytis</i> species            |
| CKmfsG2             | AGAAGAATGGGAAAAAGA       | Identification of the <i>mfsG</i> gene in other <i>Botrytis</i> species            |
| CKmfsG3             | GGAATGTCATATGAAGA        | Identification of the <i>mfsG</i> gene in other <i>Botrytis</i> species            |
| CKmfsG4             | GAATACATTCAAAGTTC        | Identification of the <i>mfsG</i> gene in other <i>Botrytis</i> species            |
| FwMfsGcinerea       | GTATACTGGAGCACAAAGCTT    | mRNA level quantification of the gene <i>mfsG</i> in <i>B. cinerea</i>             |
| RvMfsGcinerea       | GGTGAATTTCTCGTCTTCTAG    | mRNA level quantification of the gene <i>mfsG</i> in <i>B. cinerea</i>             |
| FwMfsGpseudocinerea | ATACTGGAGCACAAAGCTTT     | mRNA level quantification of the gene <i>mfsG</i> in <i>B. pseudocinerea</i>       |
| RvMfsGpseudocinerea | CTGAATTTCTCGTCTTCTAGC    | mRNA level quantification of the gene <i>mfsG</i> in <i>B. pseudocinerea</i>       |
| FwMfsGbysssoidea    | TTAGTCTTGGGAGGCTCAAT     | mRNA level quantification of the gene <i>mfsG</i> in <i>B. bysssoidea</i>          |
| RvMfsGbysssoidea    | TTATATCCTCGCCCAGATG      | mRNA level quantification of the gene <i>mfsG</i> in <i>B. bysssoidea</i>          |
| FwActAcinerea       | TTTGAGACCTTCAACGCCCC     | mRNA level quantification of the gene <i>BcactA</i> in <i>B. cinerea</i>           |
| RvActAcinerea       | ACGTGAGTAACTCCGTCACC     | mRNA level quantification of the gene <i>BcactA</i> in <i>B. cinerea</i>           |
| FwActApseudocinerea | GGTGGTATCCACGTCATA       | mRNA level quantification of the gene <i>BcactA</i> in <i>B. pseudocinerea</i>     |
| RvActApseudocinerea | CATAACAATGTTACCATACAAATC | mRNA level quantification of the gene <i>BcactA</i> in <i>B. pseudocinerea</i>     |
| FwActAbysssoidea    | TGACGATGCTCCAAGAGC       | mRNA level quantification of the gene <i>BcactA</i> in <i>B. bysssoidea</i>        |
| RvActAbysssoidea    | ATTGTCAATGACGAGGGCT      | mRNA level quantification of the gene <i>BcactA</i> in <i>B. bysssoidea</i>        |
| Fwtubcinerea        | TCCTTTTCGGTCAACTCTTCCG   | mRNA level quantification of the gene $\beta$ -tubuline in <i>B. cinerea</i>       |
| Rvtubcinerea        | CACCCTCAGTGTTAATGACCC    | mRNA level quantification of the gene $\beta$ -tubuline in <i>B. cinerea</i>       |
| Fwtubpseudocinerea  | GATCTCCAACCTTGAGCGTA     | mRNA level quantification of the gene $\beta$ -tubuline in <i>B. pseudocinerea</i> |
| Rvtubpseudocinerea  | TGCTCGCCAGAGATAGTTT      | mRNA level quantification of the gene $\beta$ -tubuline in <i>B. pseudocinerea</i> |
| Fwtubbysssoidea     | GGTGATCAATTCAGTCTAT      | mRNA level quantification of the gene $\beta$ -tubuline in <i>B. bysssoidea</i>    |
| Rvtubbysssoidea     | TTCATGTTGGACTCAGCCT      | mRNA level quantification of the gene $\beta$ -tubuline in <i>B. bysssoidea</i>    |
